# Supplementary material for: Trouser Roles in Mozart’s Clemenza di Tito and Le Nozze di Figaro: Implications for Gender Constructions in Eighteenth Century Europe
Source: MDPI journal article supplement (doi:10.3390/ijerph192013282), 2010-01-01
Supplement: s1 [file s1]

**Supplementary Table S1. Descriptive statistics of frequency and duration in hand to face contact (N=30)**

| Hand to face contact | n (%)       | Mean $\pm$ SD     | Range (Min, Max) | 5th  | 25th | 50th  | 75th  | 95th  | 99th  |
|----------------------|-------------|-------------------|------------------|------|------|-------|-------|-------|-------|
| Contact frequency*   | 2,719 (100) |                   |                  |      |      |       |       |       |       |
| <i>Mucous</i>        |             | 55.6 $\pm$ 42.2   | (6, 160)         | 11.9 | 29.0 | 41.5  | 74.0  | 122.2 | 144.8 |
| eye                  | 295 (10.8)  | 9.8 $\pm$ 11.7    | (0, 48)          | 1.0  | 3.0  | 6.5   | 12.0  | 18.2  | 37.8  |
| nose                 | 610 (22.4)  | 20.4 $\pm$ 24.5   | (0, 110)         | 3.0  | 8.0  | 13.0  | 21.8  | 35.0  | 75.2  |
| mouth                | 760 (28.0)  | 25.4 $\pm$ 23.9   | (2, 106)         | 4.0  | 8.8  | 21.5  | 26.0  | 53.3  | 73.1  |
| <i>Non-mucous</i>    |             | 35.2 $\pm$ 26.5   | (13, 153)        | 14.5 | 20.0 | 28.5  | 43.0  | 52.2  | 64.7  |
| ear                  | 133 (4.9)   | 4.4 $\pm$ 4.1     | (1, 17)          | 1.0  | 2.0  | 2.5   | 5.8   | 10.2  | 13.1  |
| head                 | 438 (16.1)  | 14.6 $\pm$ 19     | (0, 107)         | 2.4  | 6.0  | 11.0  | 16.3  | 26.1  | 28.1  |
| forehead             | 65 (2.4)    | 2.2 $\pm$ 3.7     | (0, 20)          | 0.0  | 0.0  | 1.0   | 3.0   | 4.1   | 5.0   |
| chin                 | 147 (5.4)   | 4.9 $\pm$ 4.8     | (0, 17)          | 0.0  | 2.0  | 3.0   | 7.5   | 12.2  | 14.6  |
| cheek                | 271 (10.0)  | 9.1 $\pm$ 6.9     | (0, 28)          | 1.5  | 4.0  | 6.5   | 12.0  | 19.2  | 22.7  |
| Contact duration**   | 2,719 (100) |                   |                  |      |      |       |       |       |       |
| <i>Mucous</i>        |             | 232.6 $\pm$ 169.7 | (15, 713)        | 35.5 | 77.3 | 217.5 | 307.3 | 440.8 | 502.9 |
| eye                  | 295 (10.8)  | 29.7 $\pm$ 42.3   | (0, 221)         | 2.4  | 6.3  | 16.5  | 34.0  | 55.9  | 83.8  |
| nose                 | 610 (22.4)  | 57.6 $\pm$ 62.2   | (0, 250)         | 5.0  | 23.0 | 34.0  | 67.8  | 139.4 | 196.8 |
| mouth                | 760 (28.0)  | 145.2 $\pm$ 150   | (2, 668)         | 11.0 | 34.3 | 80.0  | 226.0 | 329.4 | 383.3 |
| <i>Non-mucous</i>    |             | 174.8 $\pm$ 132.5 | (42, 683)        | 48.3 | 94.5 | 126.0 | 234.3 | 306.0 | 339.6 |
| ear                  | 133 (4.9)   | 25.3 $\pm$ 30.1   | (1, 139)         | 1.5  | 6.5  | 16.0  | 24.5  | 55.4  | 79.0  |
| head                 | 438 (16.1)  | 64.7 $\pm$ 72.9   | (0, 273)         | 9.4  | 17.0 | 28.5  | 68.3  | 187.9 | 222.1 |
| forehead             | 65 (2.4)    | 5.1 $\pm$ 9       | (0, 45)          | 0.0  | 0.0  | 2.0   | 5.0   | 14.0  | 15.7  |
| chin                 | 147 (5.4)   | 34.3 $\pm$ 47     | (0, 183)         | 0.0  | 6.3  | 12.0  | 40.0  | 120.7 | 128.7 |
| cheek                | 271 (10.0)  | 45.5 $\pm$ 45.4   | (0, 211)         | 3.5  | 13.8 | 29.0  | 67.5  | 105.0 | 108.3 |

\*Frequency/person/2h

\*\*Sec/person/2h
